# Supplementary material for: Neuroprotective effect of selumetinib on acrolein-induced neurotoxicity
Source: PubMed Central journal article supplement (PMC8203693; doi:10.1038/s41598-021-91507-6), 2021-06-14

Fig1a Acrolein-elevated ERK phosphorylation: time-dependence

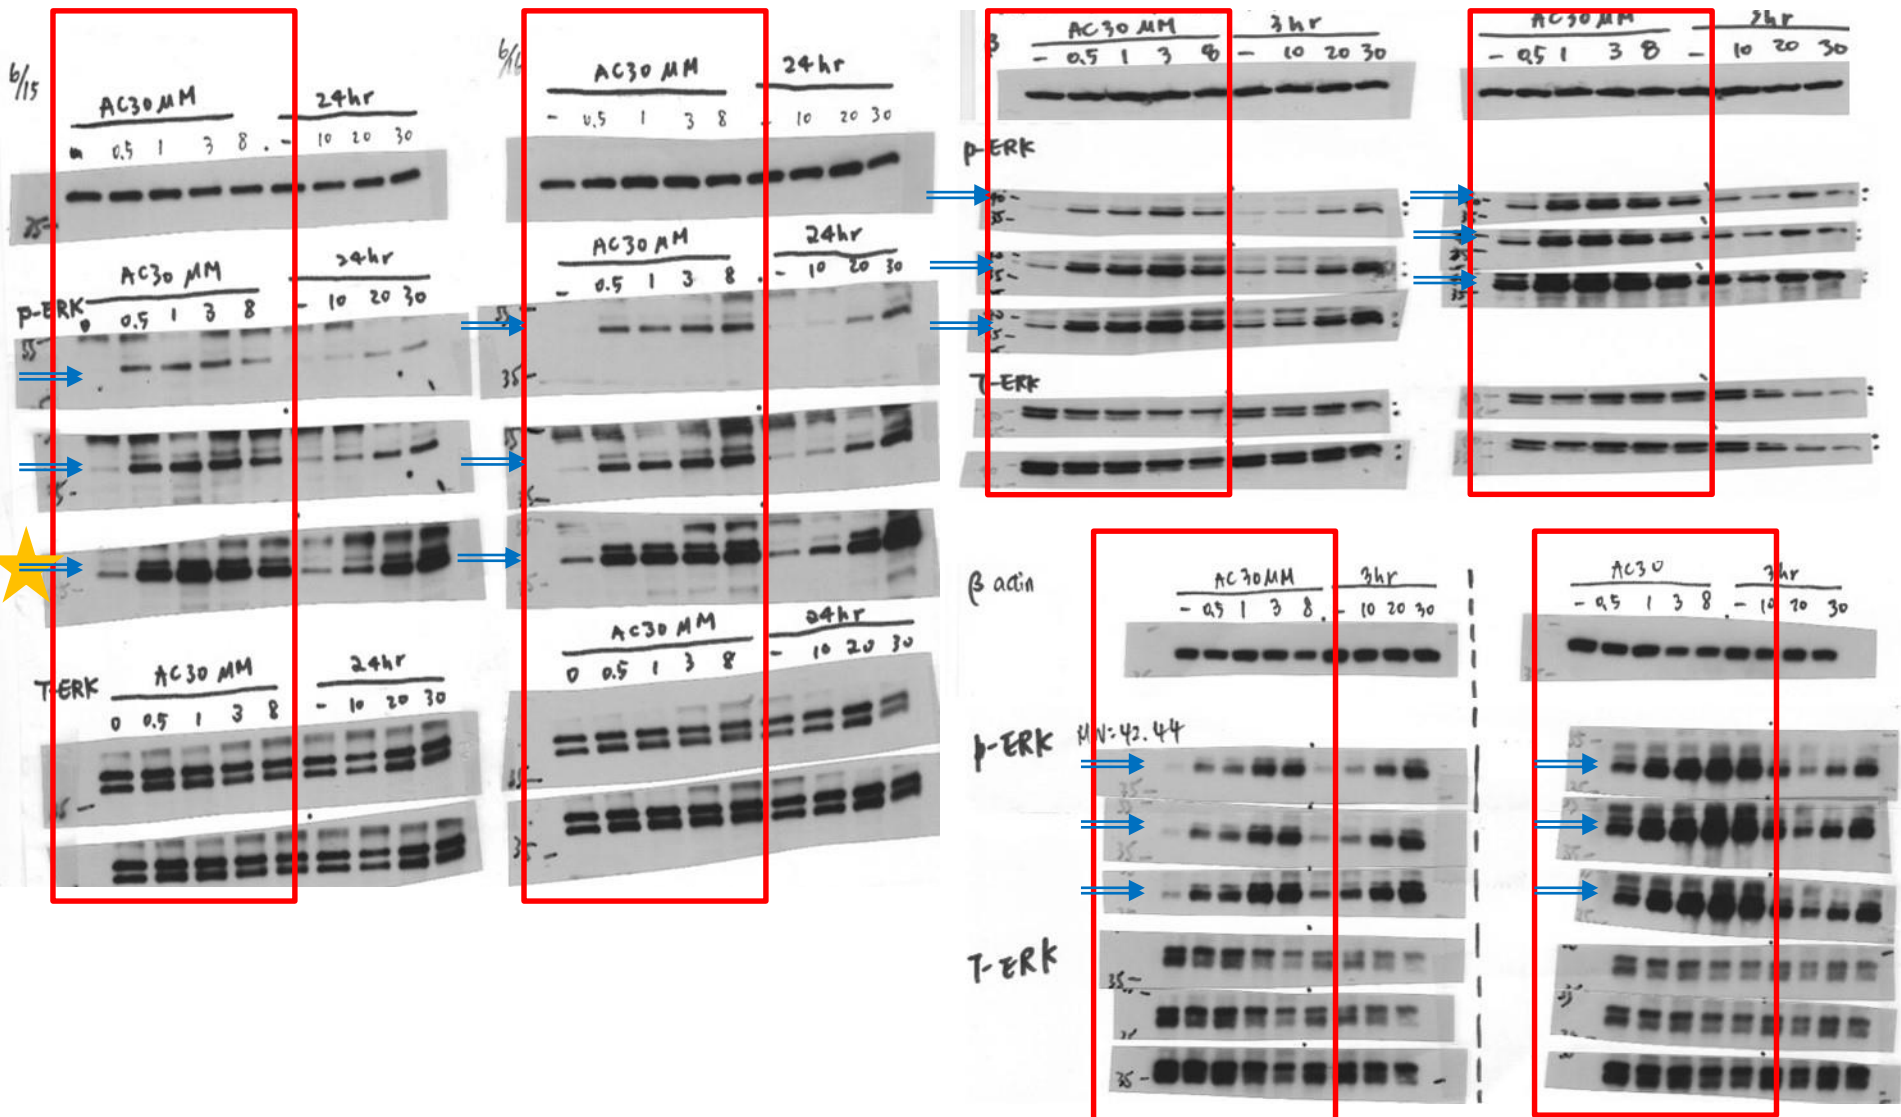

Fig1b Acrolein-elevated ERK phosphorylation: concentration-dependence

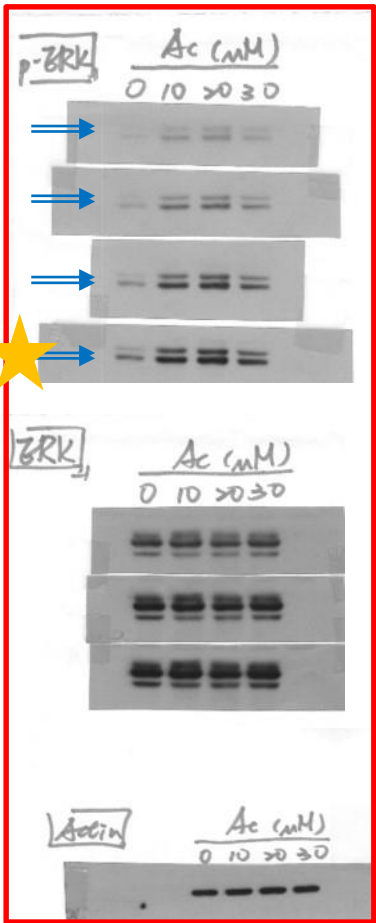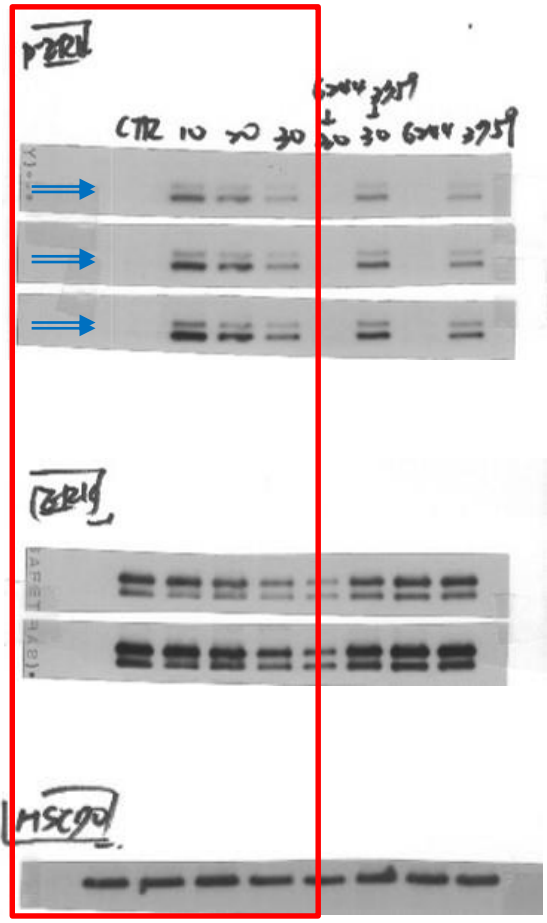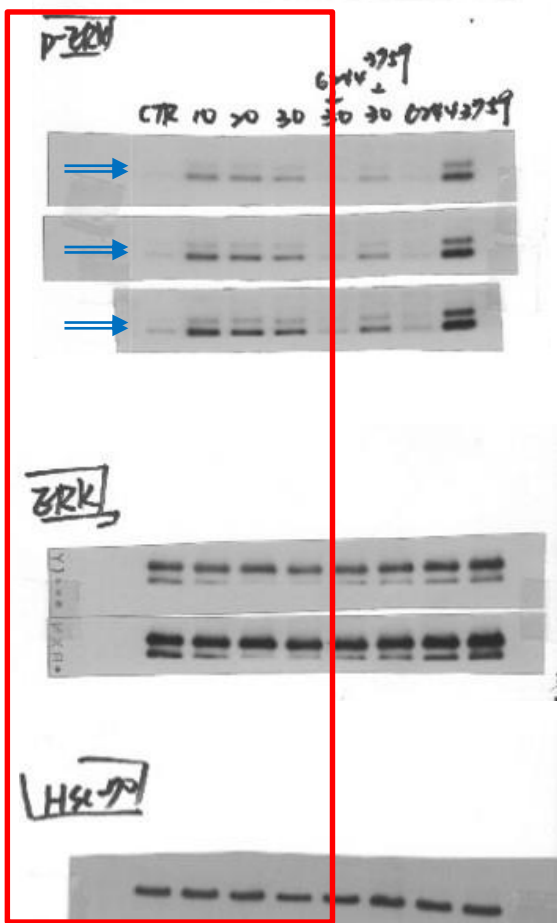

Fig1c Effect of selumetinib on acrolein-elevated ERK phosphorylation

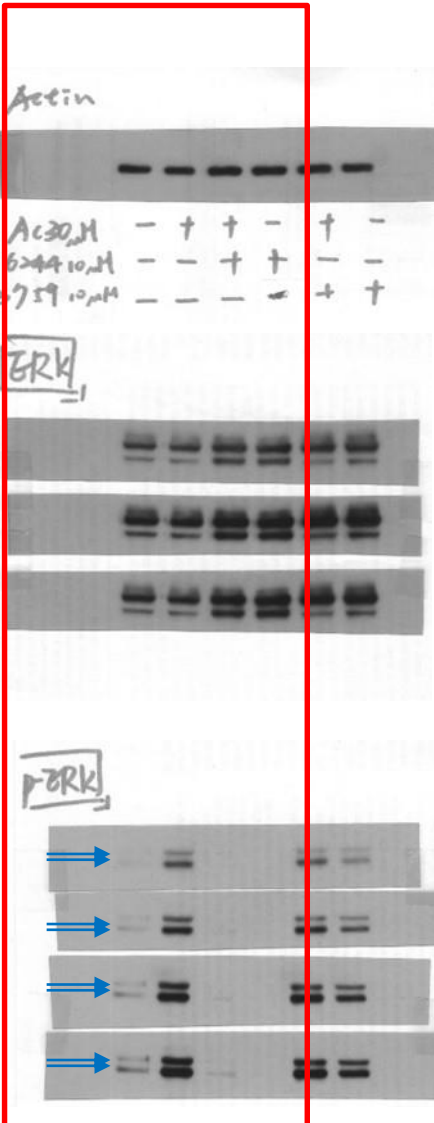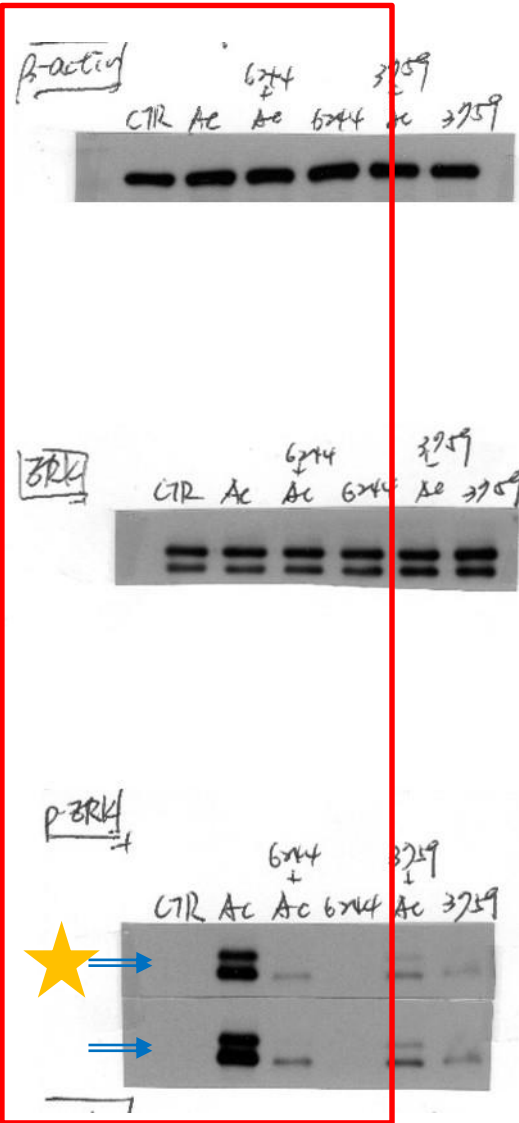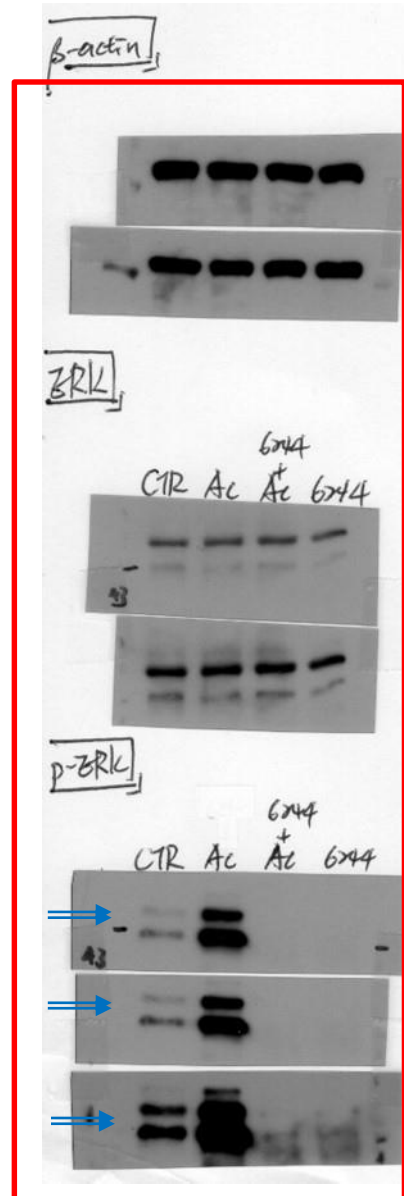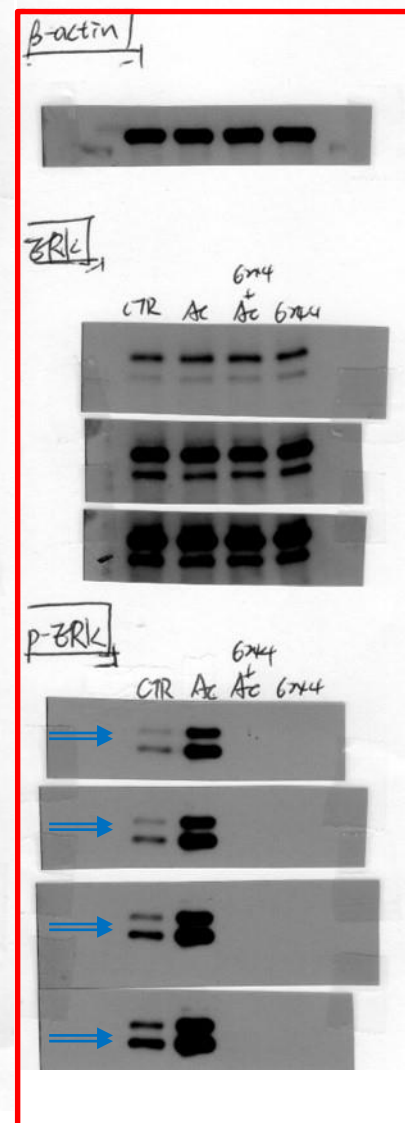

Fig2a Acrolein-induced HO-1 elevation: concentration-dependence

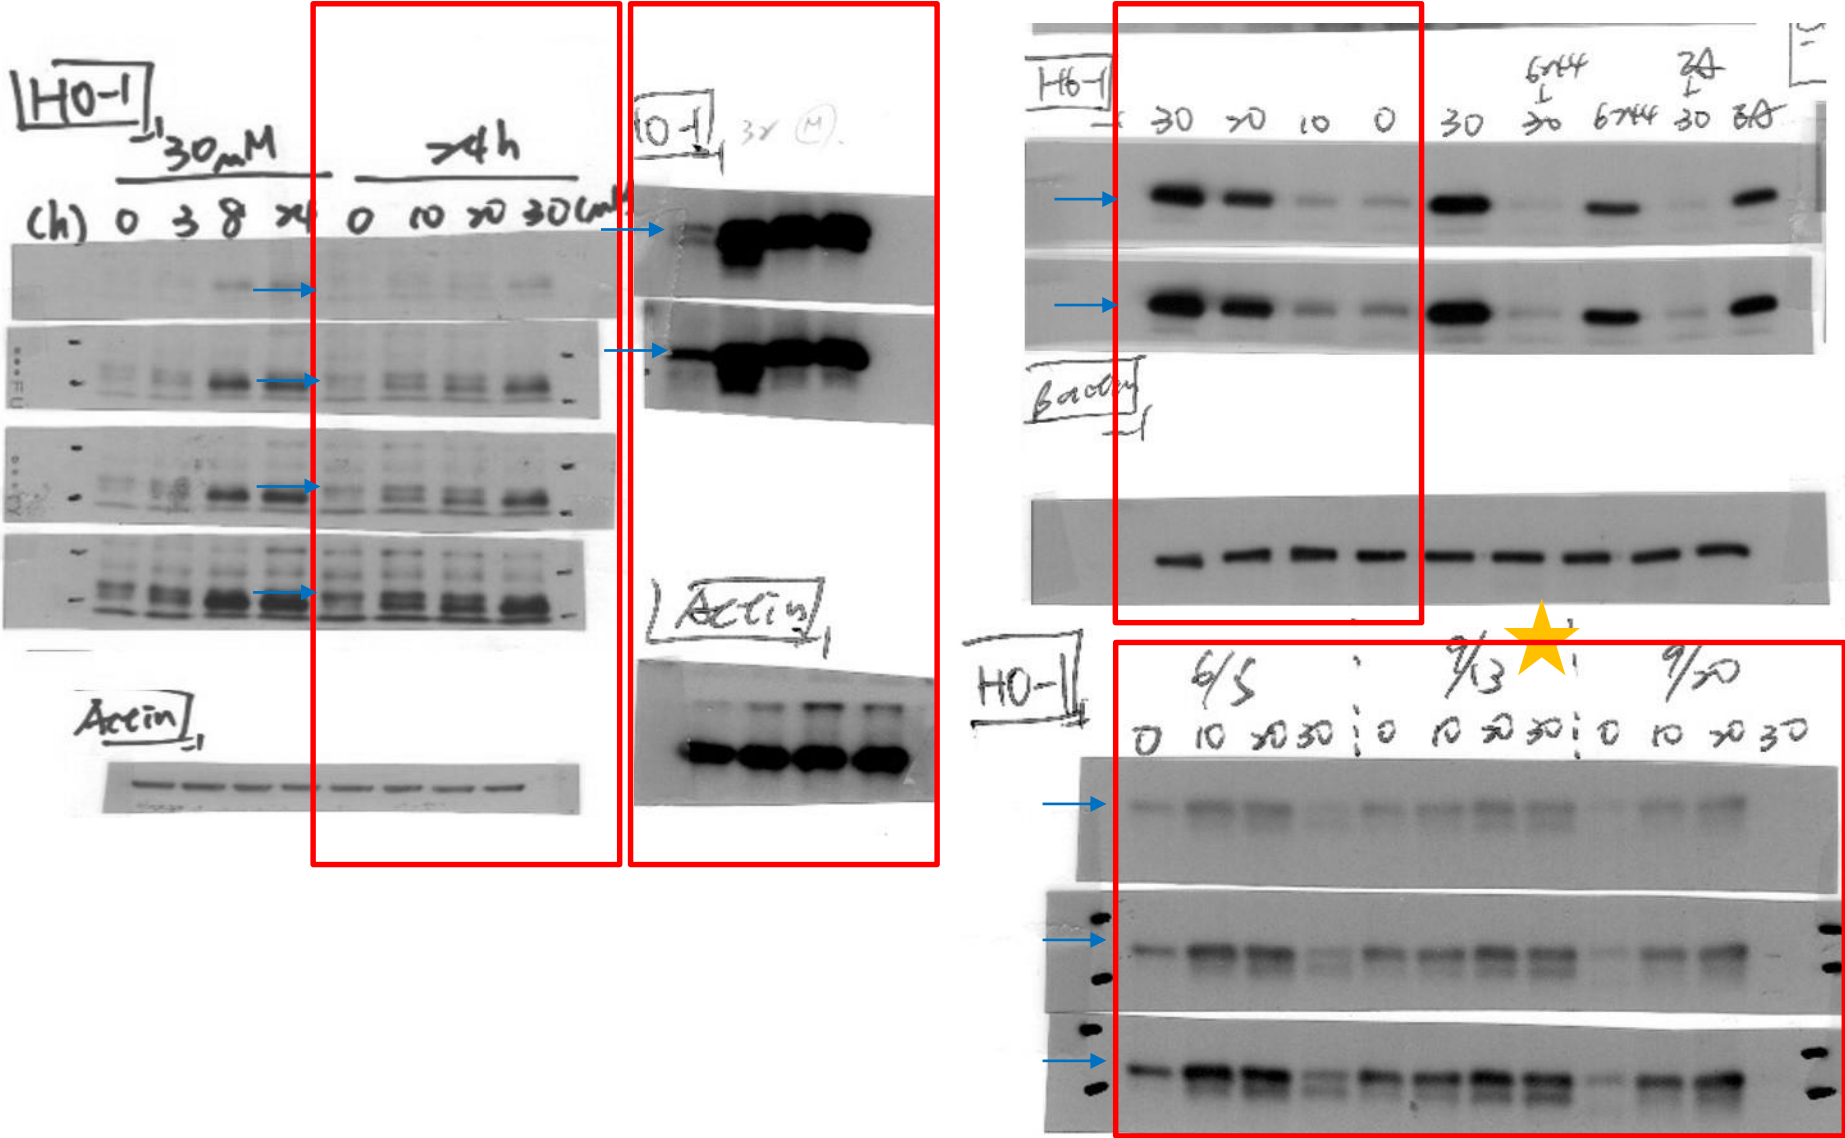

Fig2b Effect of selumetinib on acrolein-elevated Nrf-2

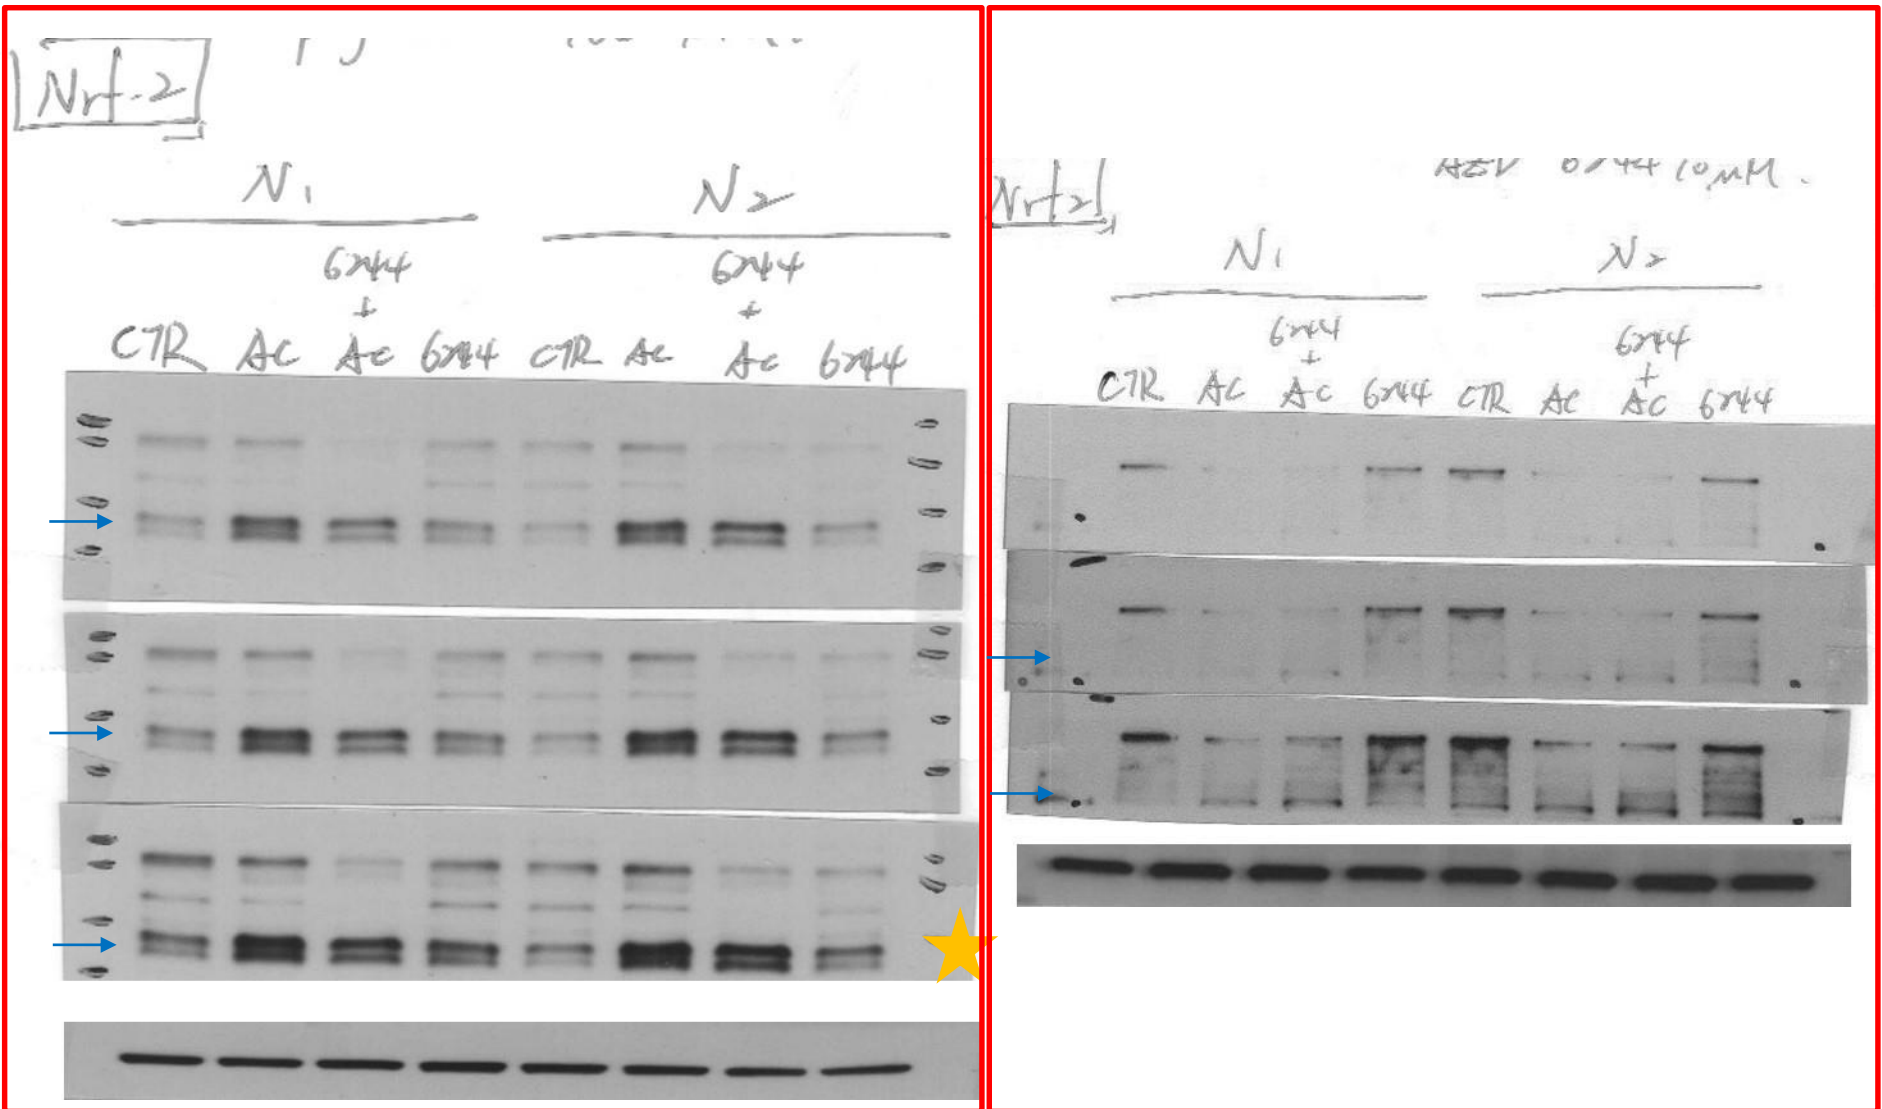



Fig2c Effect of selumetinib on acrolein-elevated HO-1

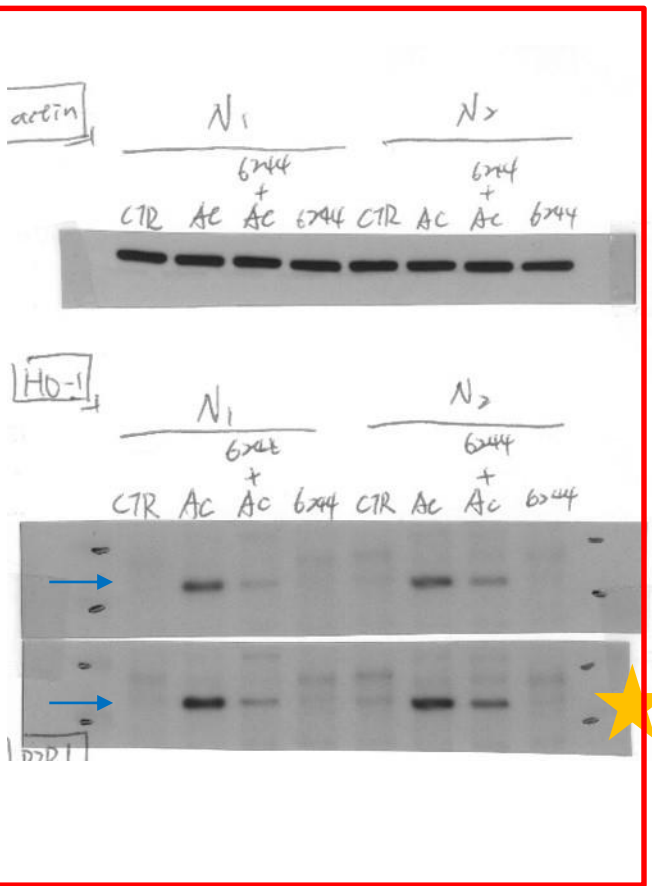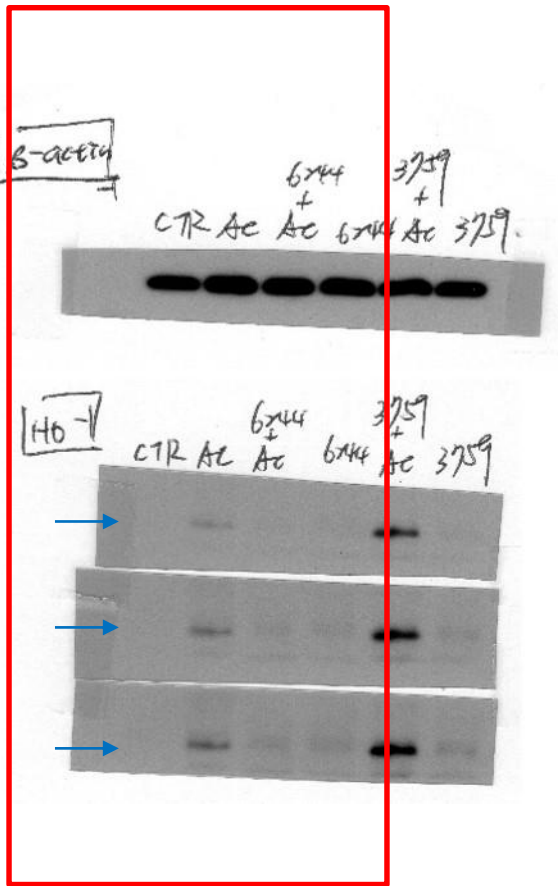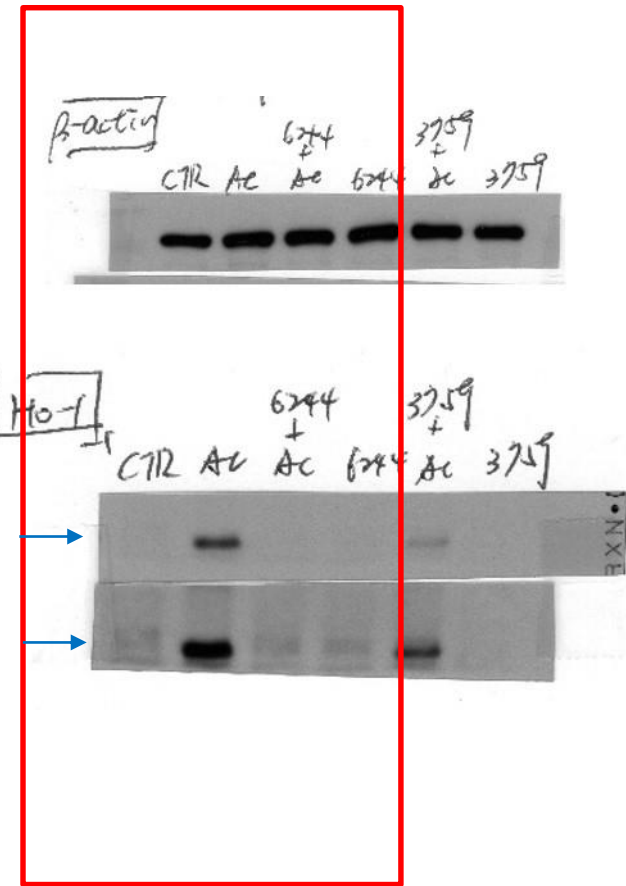

Brady

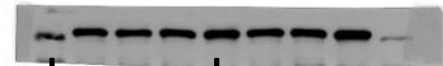

Fig3a Acrolein-induced Ac-FDP: concentration-dependence

Acrolein-FDP  
30  $\mu$ M >4h  
(1) 0 3 8 24 0 10 20 30  $\mu$ M

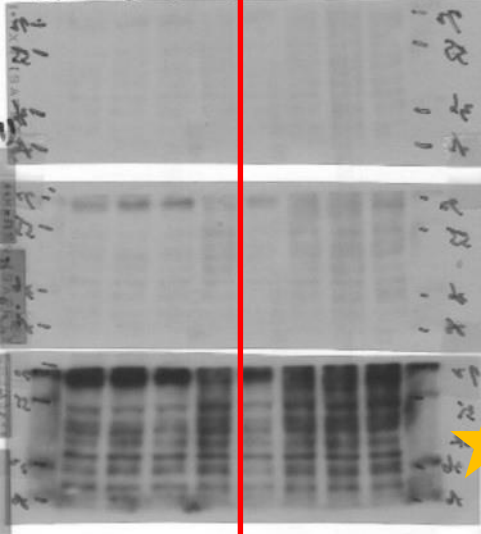

Actin

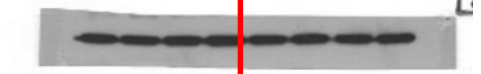

Ac-FDP

Ac 674 + Ac 674  
30 20 10 0

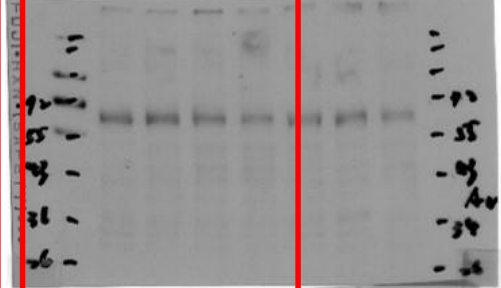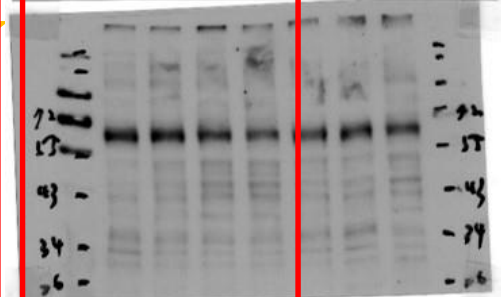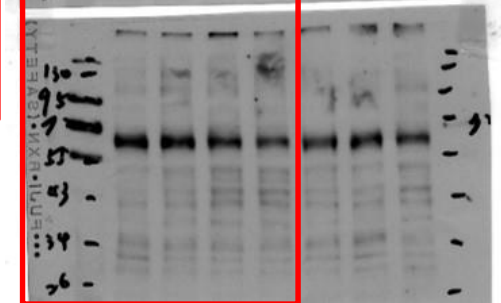

Ac

Ac (μM) 30 20 10 0 Ac 674 Ac 674

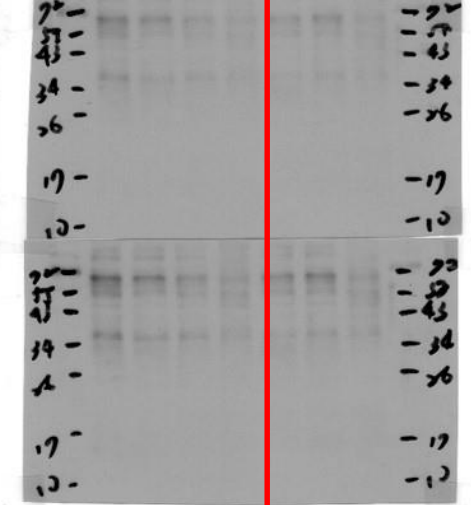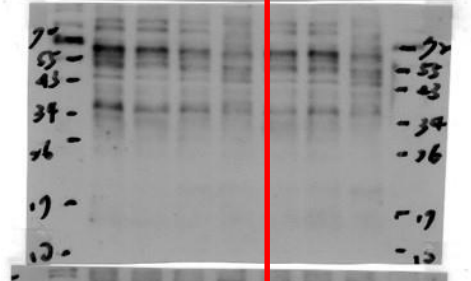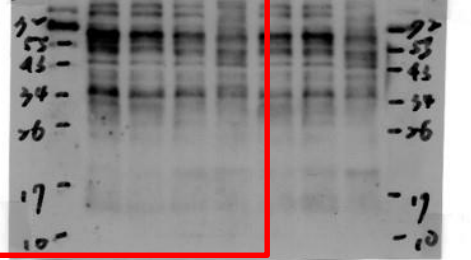

$\beta$ -actin

Fig3b Effect of selumetinib on acrolein-elevated Ac-FDP

Acrolein

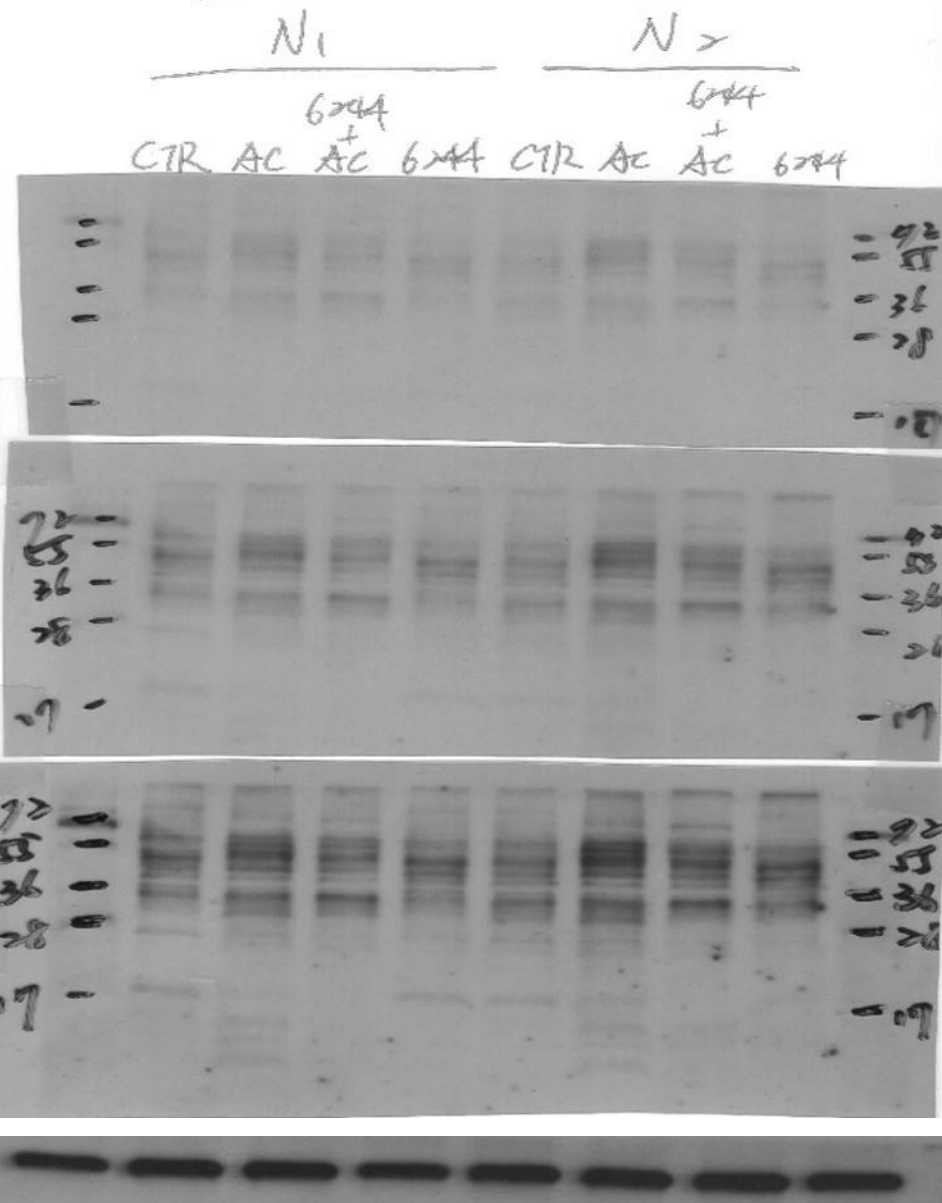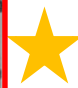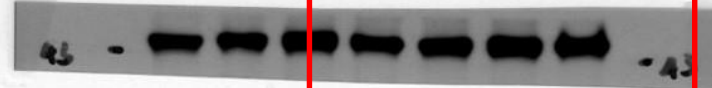

Acrolein-FDP

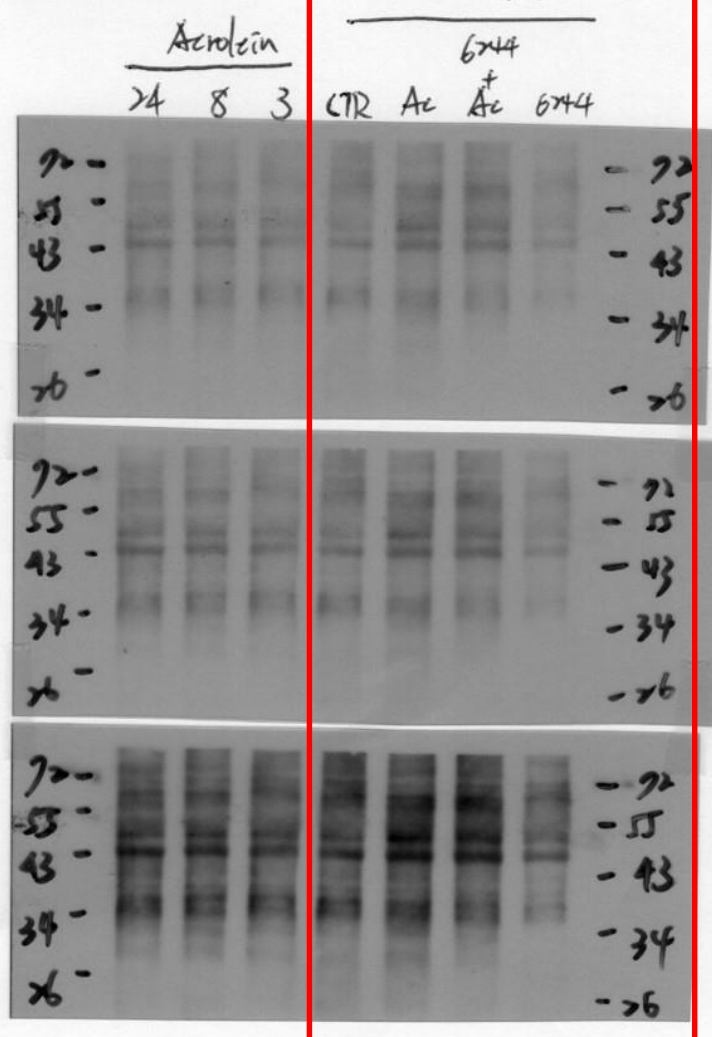



Fig3c Effect of selumetinib on acrolein-elevated  $\alpha$ -synuclein aggregates

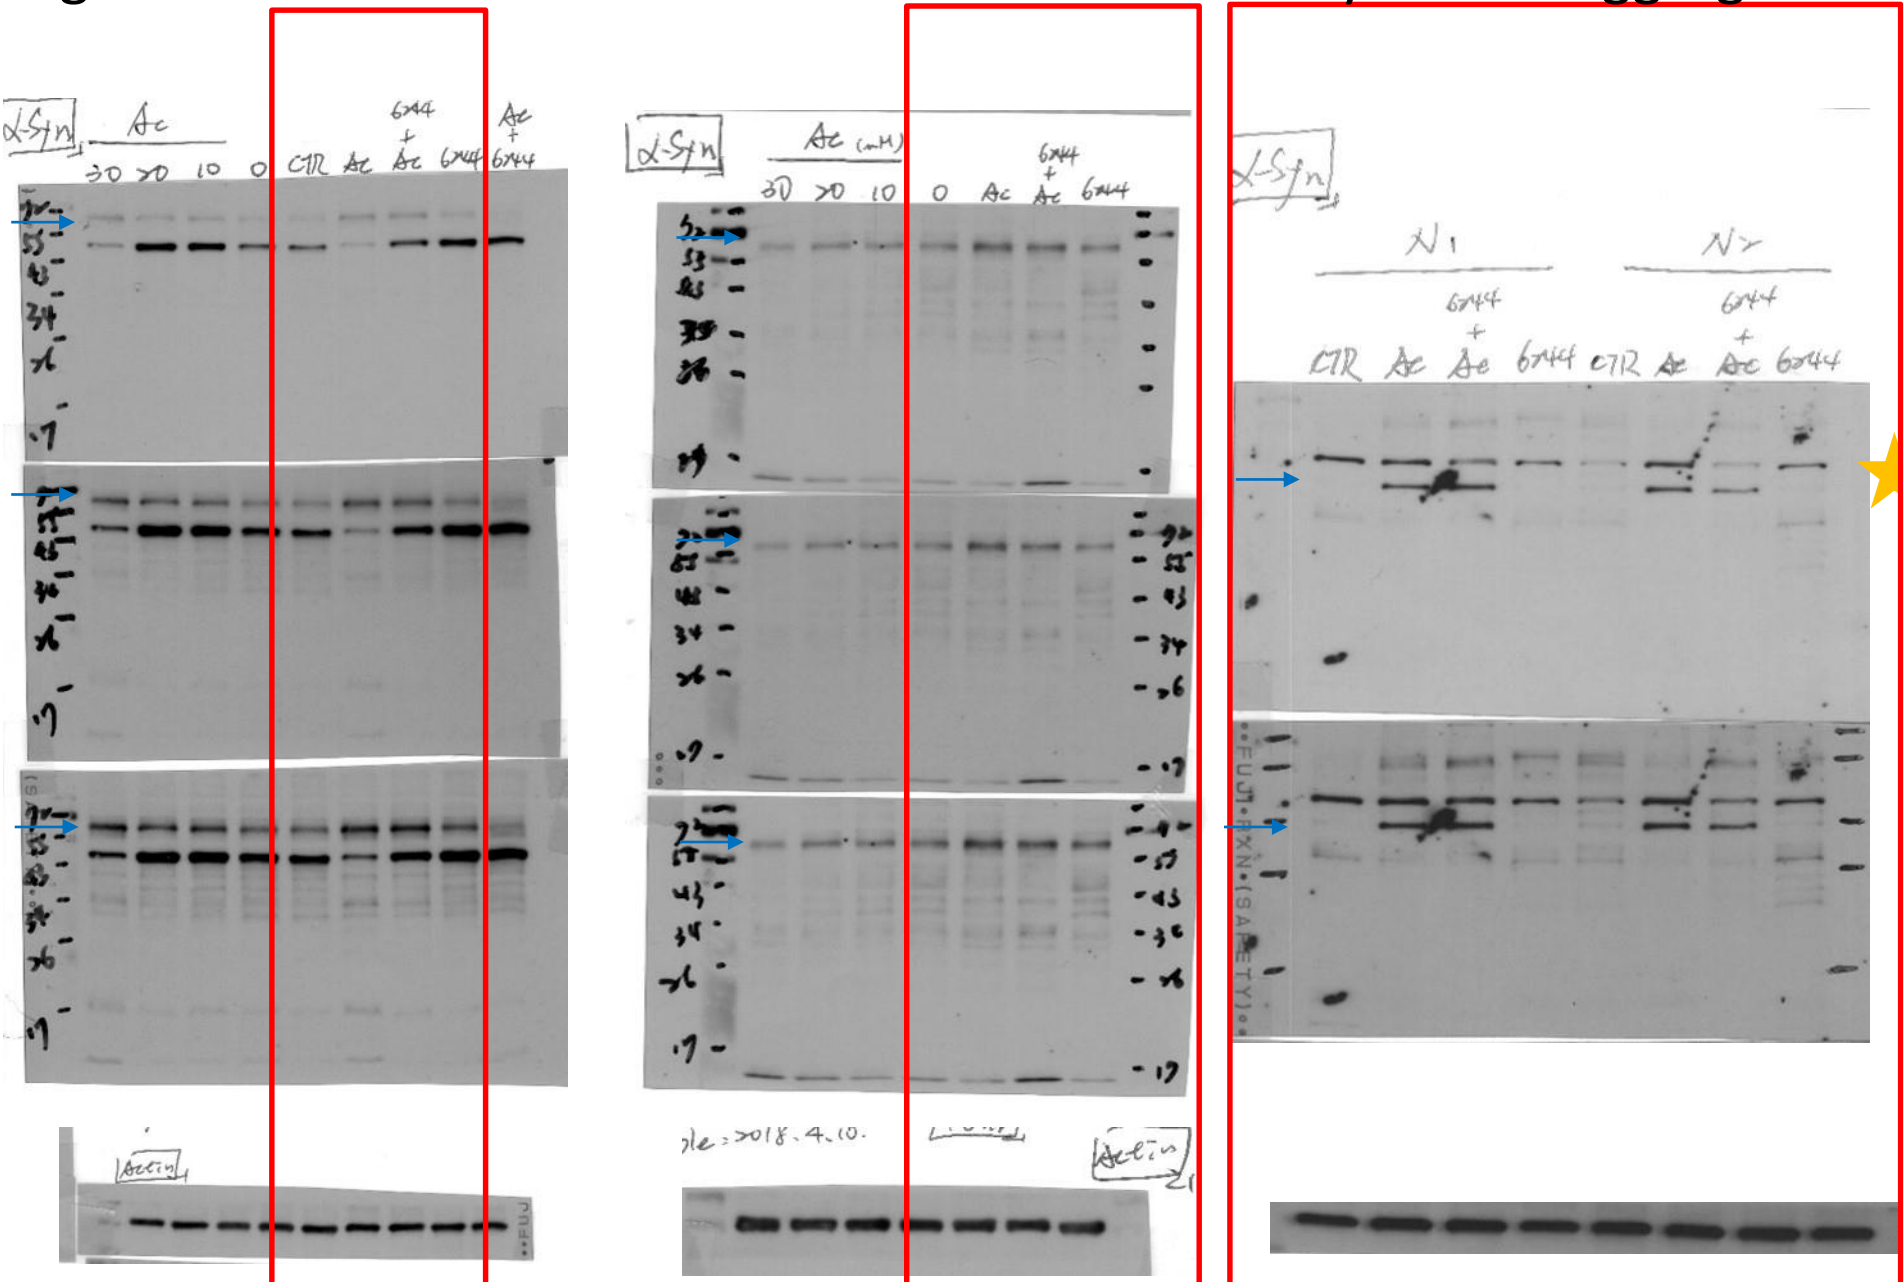

# Fig6a Acrolein-induced apoptosis: concentration-dependence

Sample: 4-15 Ac10  
Sample: 4-17 Ac30 6h

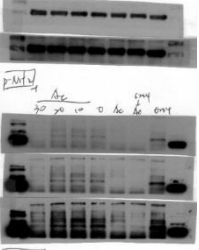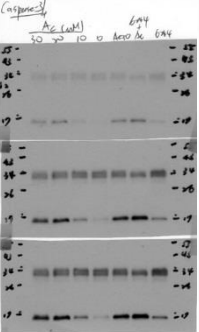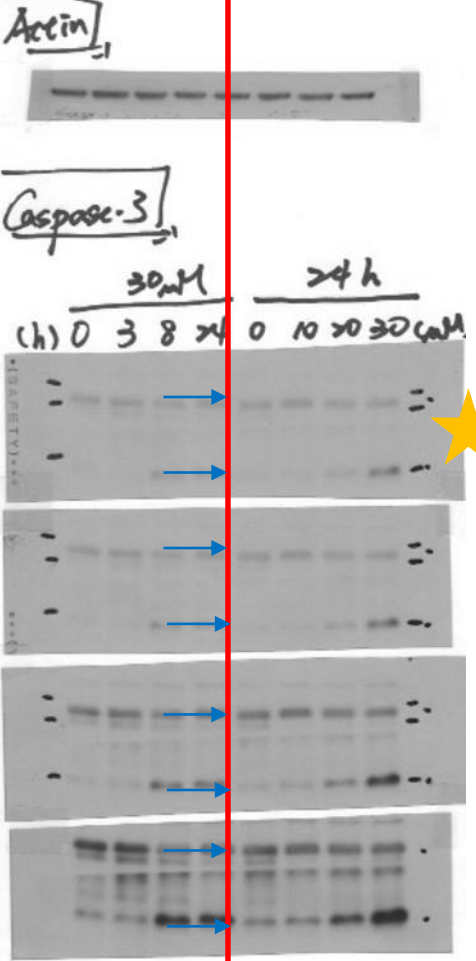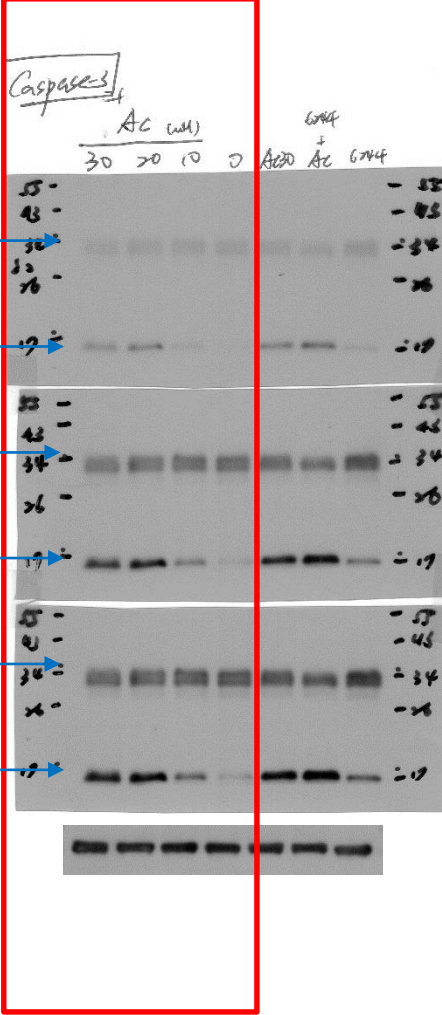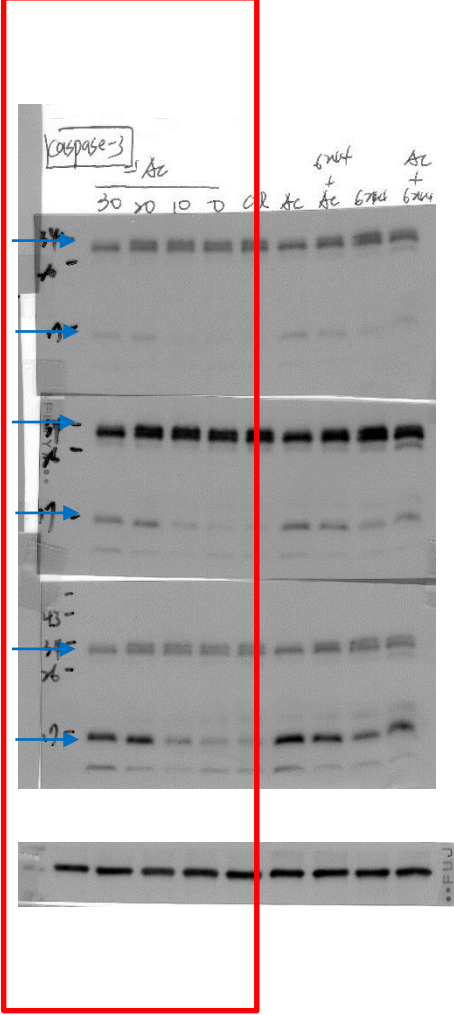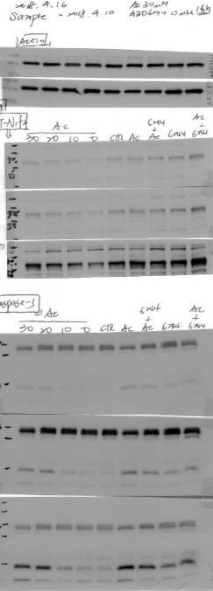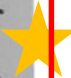

Fig6b Effect of selumetinib on acrolein-induced apoptosis

2018. 2. 20.  
 Sample = 2018. 1. 22. Ac 30μM.  
 AZD6244 10μM.

Caspase-9  
 >4hr  
 N<sub>1</sub> N<sub>2</sub>

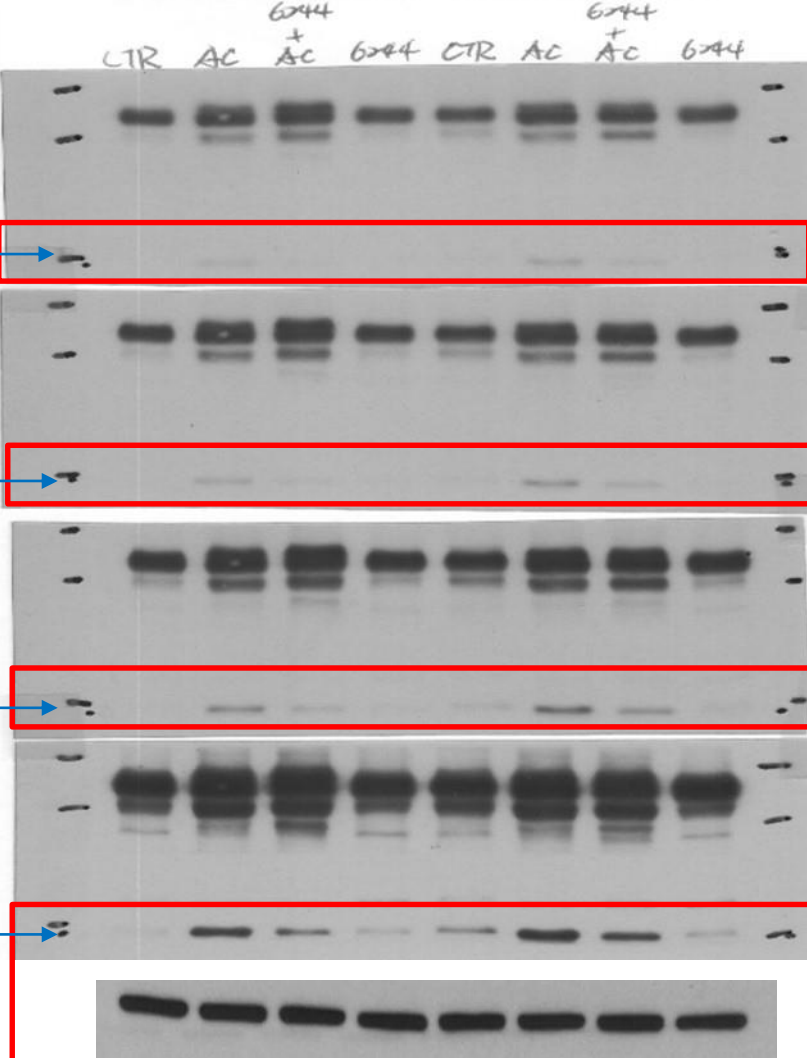

Sample: 2017-12-5 B2V co.  
 Ac 30μM. AZD 6244 10μM 24hr.  
 2018. 3. 12.

Caspase-3

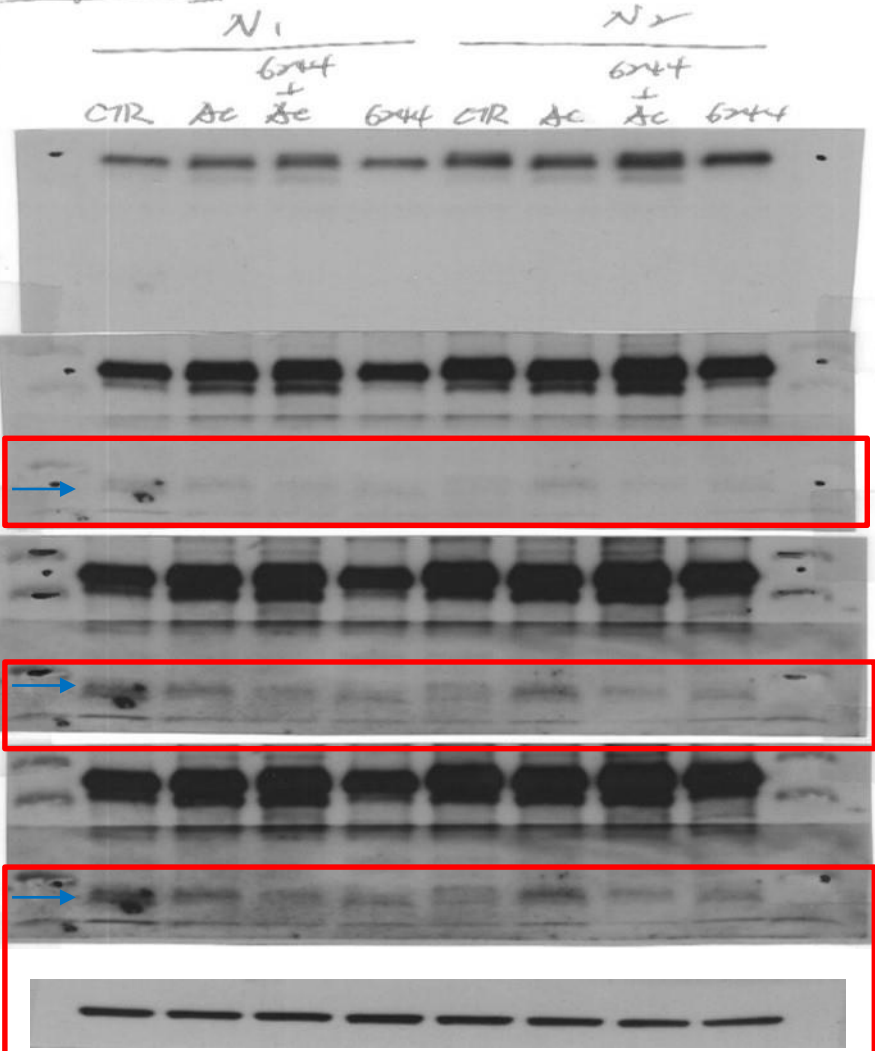

Fig6c Acrolein-induced necroptosis: concentration-dependence

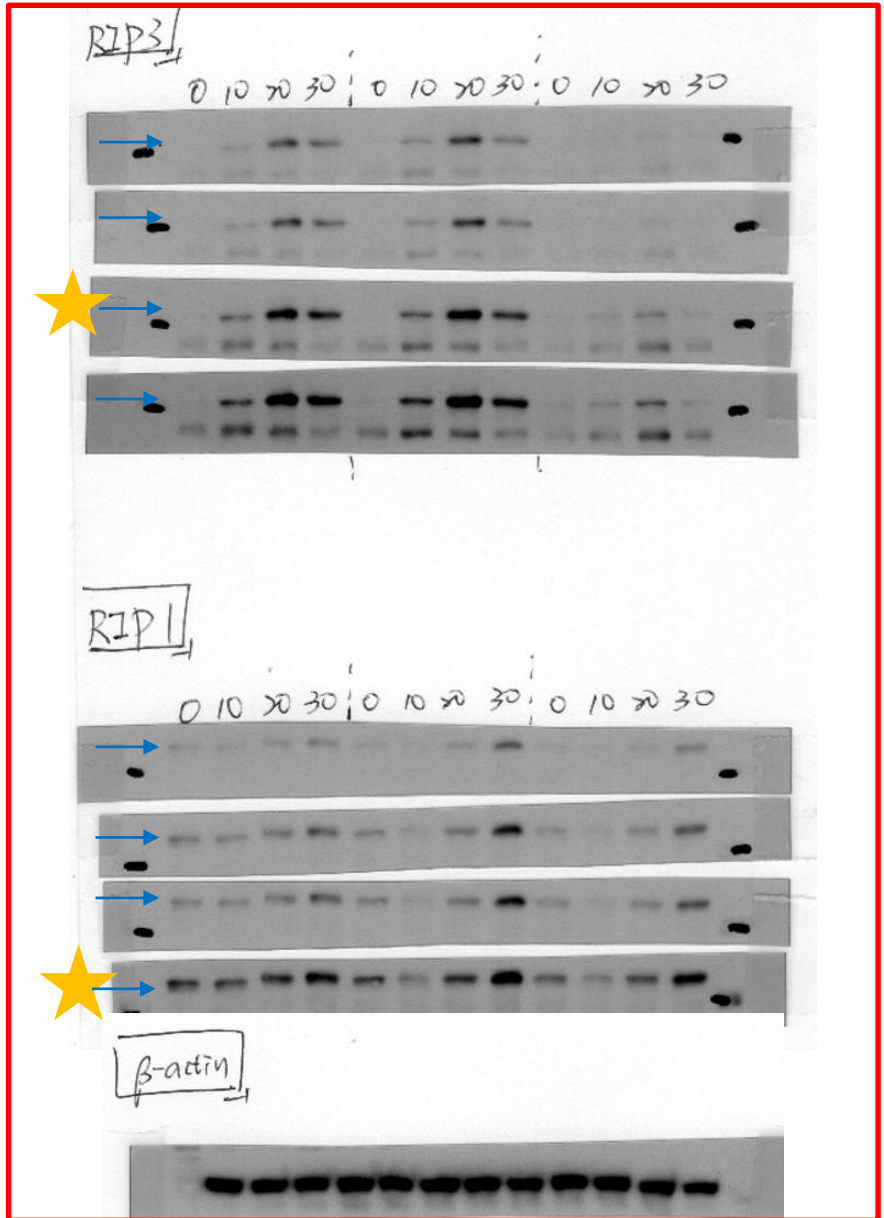

Fig6d Effect of selumetinib on acrolein-induced necroptosis

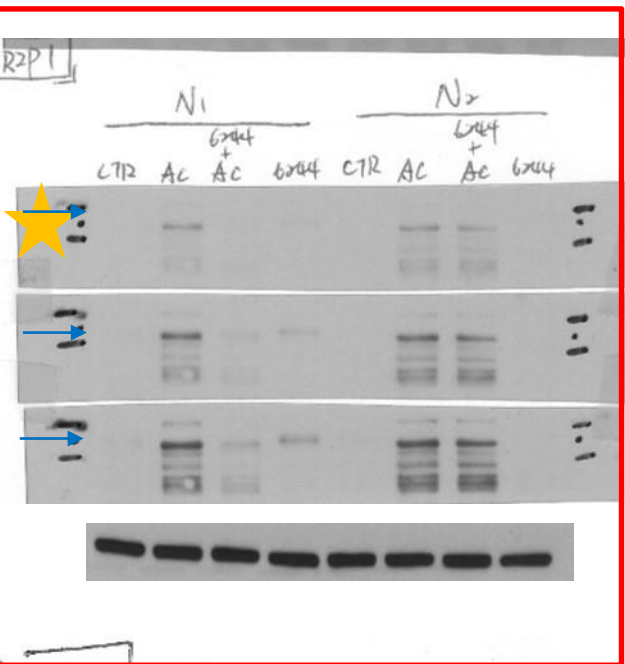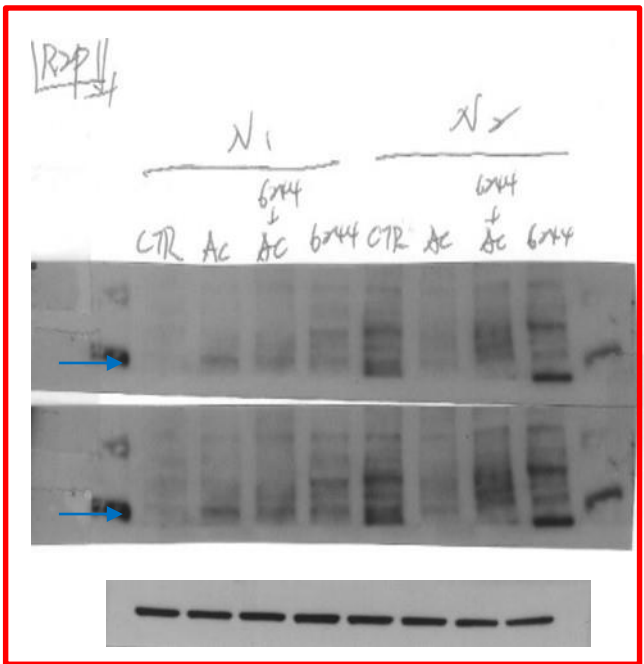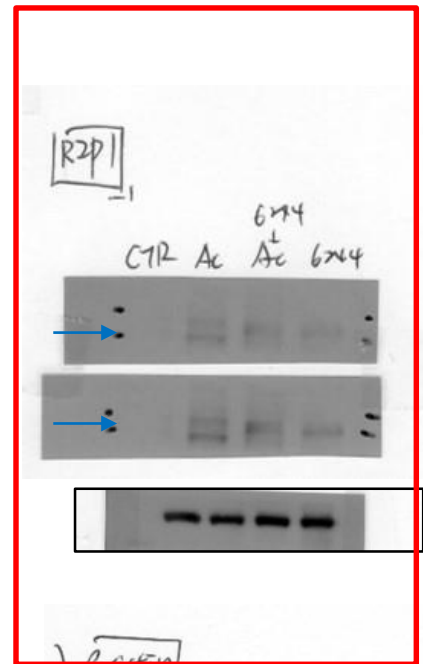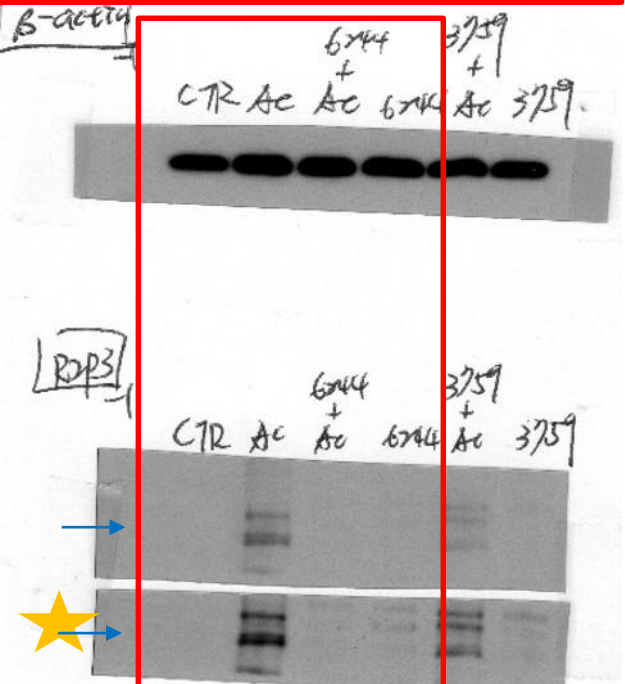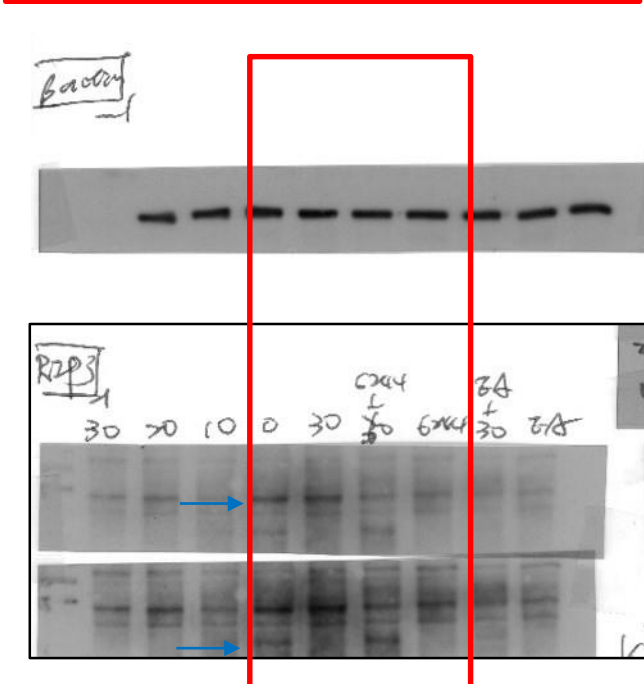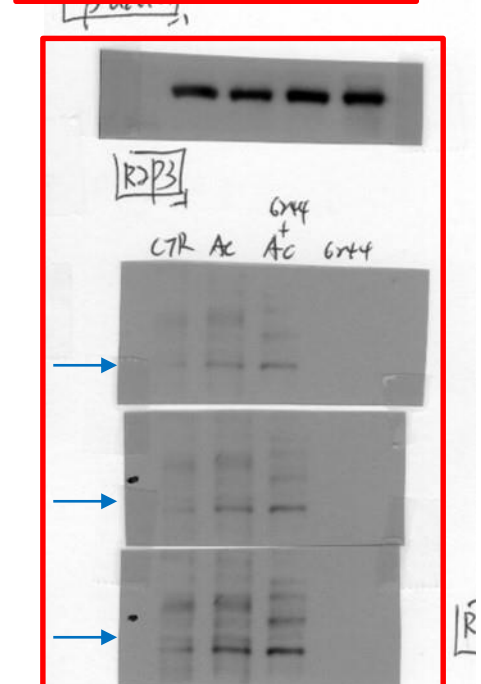

Supplement: 41598_2021_91507_MOESM1_ESM.pdf [file 41598_2021_91507_MOESM1_ESM.pdf]
